# Supplementary material
Source: publisher site journal article supplement (https://www.dovepress.com/article/225793)
Supplement: Supplementary file 1 [file get_supplementary_file.php]

## Cancer Management and Research

### **Cordyceps militaris exerts anticancer effect on Non-small-lung cancer by inhibiting Hedgehog signaling via suppression of TCTN3**

Links to the Supplementary videos:

Supplementary video 1A: <https://www.youtube.com/watch?v=3ssyccXOzTE>

Supplementary video 1B : <https://www.youtube.com/watch?v=77aYk8CIt6Q>

Supplementary video 1C: <https://www.youtube.com/watch?v=FUCMOnC1JCs>

Supplementary video 1D: <https://www.youtube.com/watch?v=LG22kjuhLsQ>

Supplementary video 1E: [https://www.youtube.com/watch?v=9dLSallj\\_i8](https://www.youtube.com/watch?v=9dLSallj_i8)

Supplementary video 1F: <https://www.youtube.com/watch?v=mUV5B2yIKk8>

Supplementary video 1G: <https://www.youtube.com/watch?v=EpVISZIToRo>

Supplementary video 1H: <https://www.youtube.com/watch?v=1quPheLOibQ>

Supplementary video 1I: <https://www.youtube.com/watch?v=T71v9AwYfBE>

Supplementary video 1J: <https://www.youtube.com/watch?v=BCkriShWKgE>
